# Supplementary material for: microRNA-1246-containing extracellular vesicles from acute myeloid leukemia cells promote the survival of leukemia stem cells via the LRIG1-meditated STAT3 pathway
Source: Aging (Albany NY). 2021 Apr 23;13(10):13644–62. doi: 10.18632/aging.202893 (PMC8202884; doi:10.18632/aging.202893)
Supplement: Supplementary Table 1 [file aging-13-202893-s001.xls]

## Sheet: Sheet1
Supplementary Table 1. Differentially expressed miRNAs in acute myeloid leukemia samples.
symbol	logFC	AveExpr	t	P.Value	adj.P.Val
hsa-mir-1246	3.71814	4.36294	32.4547	1.41983e-13	2.36331e-09
U49A	-3.80185	3.87272	-24.2364	5.42542e-12	4.5153e-08
U105B	-4.09106	3.34247	-23.093	9.88075e-12	4.82201e-08
hsa-mir-3131	6.93496	4.57514	22.1034	1.6993e-11	5.65696e-08
HBII-99	-3.08344	2.36633	-20.6408	3.9573e-11	1.09782e-07
dan-mir-289	4.63513	6.88162	18.8692	1.19267e-10	2.83599e-07
pma-mir-4607	4.40785	7.26897	16.7349	5.16472e-10	6.50203e-07
U52	-4.68132	4.81221	-16.7282	5.18986e-10	6.50203e-07
HBII-55	-4.41592	4.17858	-16.6332	5.56204e-10	6.50203e-07
U49B	-3.19317	3.70338	-16.5912	5.73537e-10	6.50203e-07
dpe-mir-289	4.40041	6.83872	16.562	5.85944e-10	6.50203e-07
U75	-4.49279	5.18015	-16.0369	8.66066e-10	7.21123e-07
dse-mir-289	4.38158	6.83046	16.0363	8.66474e-10	7.21123e-07
U76	-4.5683	4.95951	-15.6507	1.16317e-09	8.80042e-07
HBII-438A	-3.10161	3.33294	-15.3664	1.45144e-09	1.00664e-06
ppy-mir-1908	4.39177	9.20719	15.2256	1.62188e-09	1.04813e-06
HBII-135	-3.34524	3.43308	-15.2137	1.63721e-09	1.04813e-06
ptr-mir-1246	7.2685	7.35828	15.1599	1.70862e-09	1.05333e-06
dps-mir-289	4.42823	6.8474	15.0854	1.81312e-09	1.07783e-06
dme-mir-289	4.323	6.84169	14.856	2.1802e-09	1.20965e-06
U29	-4.68672	6.24822	-14.6608	2.5559e-09	1.35121e-06
lla-mir-28	-3.05253	3.31436	-14.4363	3.07578e-09	1.49052e-06
dya-mir-289	4.30638	6.87237	14.3799	3.22372e-09	1.49052e-06
HBII-438B	-3.24147	3.46322	-14.1393	3.94533e-09	1.6858e-06
U28	-3.56706	3.45382	-14.1379	3.94991e-09	1.6858e-06
U35A	-4.24737	4.03135	-14.0568	4.23129e-09	1.76075e-06
der-mir-289	4.28286	6.80345	13.8314	5.13263e-09	1.98566e-06
dsi-mir-289	4.67196	6.75454	13.8054	5.24897e-09	1.98566e-06
hsa-mir-1290	5.39652	3.63183	13.2418	8.61982e-09	2.9281e-06
ppt-MIR903	4.12134	8.48604	12.8503	1.23013e-08	3.95042e-06
U44	-3.93327	6.6288	-12.8261	1.25787e-08	3.95042e-06
mne-mir-28	-3.14982	3.30999	-12.7029	1.40972e-08	4.14279e-06
U50	-4.00514	3.95524	-12.6961	1.41868e-08	4.14279e-06
ACA7	-3.08701	3.00408	-12.5713	1.59407e-08	4.49716e-06
gma-MIR4398	4.55921	7.29762	12.4827	1.73253e-08	4.80632e-06
U25	-4.12706	5.95684	-12.2839	2.0929e-08	5.32376e-06
Z17B	-3.66729	2.90096	-12.283	2.09464e-08	5.32376e-06
U56	-3.70161	4.03143	-12.1694	2.33611e-08	5.80368e-06
U78	-5.13067	6.03088	-12.0132	2.71826e-08	6.55732e-06
U83	-4.83859	4.41411	-11.6302	3.96898e-08	8.69258e-06
U36A	-3.11361	2.72563	-11.239	5.90732e-08	1.15679e-05
U54	-3.93273	4.60845	-10.7767	9.59509e-08	1.69905e-05
mmu-mir-762	3.53802	9.56801	10.7107	1.02975e-07	1.76703e-05
U55	-4.55459	7.39126	-10.6912	1.05153e-07	1.78598e-05
mgh28S-2409	-3.35347	5.01545	-10.6359	1.11603e-07	1.85763e-05
ptr-mir-663a	3.68048	10.4533	10.6087	1.14936e-07	1.89417e-05
ppy-mir-1469	3.1517	10.8243	10.5692	1.19955e-07	1.9575e-05
U30	-3.64832	4.27247	-10.5438	1.23304e-07	1.99262e-05
hsa-mir-1469	3.19529	10.8225	10.4466	1.37101e-07	2.13275e-05
mgh28S-2411	-3.05346	6.0323	-10.0591	2.10914e-07	3.01112e-05
tgu-mir-2966	3.6849	9.67828	10.056	2.11656e-07	3.01112e-05
hsv2-mir-H5	3.66751	7.13012	9.97905	2.30923e-07	3.23002e-05
ath-MIR854b	-3.72813	3.40324	-9.95939	2.36142e-07	3.27549e-05
ppy-mir-486	3.59416	3.24544	9.94121	2.41081e-07	3.31397e-05
U95	-3.29604	7.15086	-9.82167	2.76429e-07	3.62296e-05
oan-mir-451	4.05531	4.26077	9.77633	2.91251e-07	3.72913e-05
hsa-mir-941-1	3.84951	4.62209	9.29834	5.11158e-07	5.63459e-05
U32A	-3.06463	3.31007	-9.22339	5.59408e-07	6.0075e-05
cfa-mir-362	-3.04391	2.84785	-9.20027	5.7526e-07	6.13795e-05
ath-MIR854a	-3.4339	3.70436	-9.1749	5.93204e-07	6.28909e-05
xtr-mir-122	4.81618	3.29796	8.63072	1.16484e-06	9.79226e-05
bdi-MIR5203	3.63505	2.92745	8.52544	1.33207e-06	0.000108158
U73a	-3.07158	5.24505	-8.51834	1.34423e-06	0.000108615
U33	-4.17646	5.8188	-8.46603	1.4376e-06	0.000114492
bta-mir-451	4.08112	4.14139	8.43848	1.48951e-06	0.000117502
bta-mir-1224	3.98386	5.49442	8.31984	1.73711e-06	0.000133245
bmo-mir-2825	3.89815	9.96189	8.28483	1.81828e-06	0.000137263
mml-mir-19a	-3.13668	3.6679	-8.1368	2.20903e-06	0.000159271
tgu-mir-451	3.95146	4.41277	8.09777	2.32633e-06	0.000165478
pma-let-7d	-3.31803	3.70225	-8.09323	2.34039e-06	0.000165769
U41	-3.85722	6.01355	-8.06269	2.43742e-06	0.000170466
HBII-180A	-3.38479	4.58239	-7.87162	3.1505e-06	0.000204844
gga-mir-451	3.64149	4.45504	7.80656	3.44151e-06	0.000219479
cfa-mir-122	5.00121	3.2139	7.75331	3.701e-06	0.000229122
oan-mir-1394	3.06021	5.7714	7.66247	4.19296e-06	0.00025015
bta-mir-658	3.42962	5.53318	7.65713	4.22393e-06	0.000251097
tgu-mir-122	4.69973	3.08753	7.42336	5.85144e-06	0.000324657
ptr-mir-1290	4.75973	3.38169	7.4113	5.95173e-06	0.000326952
U34	-3.81014	5.8905	-7.2526	7.4562e-06	0.000383051
ptr-mir-122	4.79545	3.21459	7.24449	7.54317e-06	0.000386326
fru-mir-122	4.6177	3.04538	7.23699	7.62466e-06	0.000388112
cfa-mir-17	-3.06601	4.14773	-7.15632	8.56184e-06	0.000421633
U57	-4.5697	5.62286	-7.12727	8.92869e-06	0.000437112
ppy-mir-1292	3.01909	4.2028	7.09483	9.3582e-06	0.000454132
ath-MIR854e	-3.07901	3.77292	-7.05675	9.8904e-06	0.000477176
hsa-mir-4634	3.06401	5.81085	7.03264	1.0244e-05	0.000489975
pma-mir-4581	3.16378	4.42436	7.01759	1.04714e-05	0.000495159
eca-mir-122	4.4381	3.30362	6.84318	1.35354e-05	0.000605634
dre-mir-122	4.5961	3.2778	6.80042	1.44232e-05	0.000635116
hbv-mir-B2RC	3.41919	4.22719	6.62135	1.88694e-05	0.000783244
ssc-mir-122	4.4698	3.26139	6.22993	3.44659e-05	0.00126744
mdo-mir-122	3.93424	3.10017	6.12043	4.0946e-05	0.00146569
bta-mir-122	4.29113	3.07031	5.85855	6.22436e-05	0.00201958
tni-mir-122	4.446	3.06618	5.77974	7.07366e-05	0.00222024
mml-mir-122a	4.0773	3.21772	5.75468	7.3687e-05	0.00229256
ppy-mir-122	4.31736	3.24494	5.53186	0.000106372	0.00310081
gga-mir-1806	5.40606	5.67707	5.33425	0.000148166	0.00397917
aly-MIR4235	3.83826	3.11985	3.79501	0.00232818	0.032869
